# Supplementary material for: The Effectiveness of the "Early Clinical Exposure" Course Based on Narrative Medicine in Cultivating the Professional Qualities of Undergraduates in Clinical Medicine: A Mixed-Methods Study
Source: Research Square preprint supplement (doi:10.21203/rs.3.rs-7729445/v1), 2025-12-01
Supplement: Supplementary file 2 [file e777a947c053b9113fbac2e0.docx]

**Pre-Course Survey for Early Clinical exposure**

Dear Students,

Hello! We are members of the Teaching and Research Group for the Early Clinical exposure  course at Southern Medical University. We kindly ask you to complete this questionnaire before the course begins. It is expected to take you 3-5 minutes to fill out.

All results of this questionnaire will only be used for teaching research by our research group and will not be disclosed to any irrelevant parties. Please feel free to fill it out. Thank you!

**I. Basic Information**

Which class are you currently in?

Clinical Medicine College 1, Class 1

Clinical Medicine College 1, Class 2

Clinical Medicine College 1, Class 3

Clinical Medicine College 2, Class 1

Clinical Medicine College 2, Class 2

Clinical Medicine College 2, Class 3

What is your gender?

Female

Male

**II. Survey Questions**

Question 1: What is your original intention for choosing Clinical Medicine as your major?

1. Strong interest in medicine
2. Family influence or recommendation from relatives/friends
3. Considerations of social status and income
4. Others (please specify: ____________________)

Question 2: How would you rate your overall enthusiasm for the Clinical Medicine major?

1. Very high
2. High
3. Moderate
4. Low
5. Very low
6. None

Question 3: How do you perceive the difficulty of studying the Clinical Medicine major?

1. Very difficult
2. Difficult
3. Moderate
4. Relatively easy
5. Very easy

Question 4: What type of work do you hope to engage in after graduation?

1. Frontline clinical doctor (e.g., resident physician, attending physician, etc.)
2. Medical research (e.g., researcher, laboratory staff, etc.)
3. Medical education (e.g., university teacher, lecturer at a medical school, etc.)
4. Medical management (e.g., hospital administration, medical policy formulation, etc.)
5. Other medical-related work (e.g., public health services, etc.) (please specify: ____________________)
6. Work in pharmaceutical companies, medical device companies, or other related enterprises
7. Non-medical-related work

Question 5: If you engage in medical work after graduation, which of the following institutions do you hope to work in?

1. Public tertiary hospital
2. Public secondary hospital
3. Community health service center
4. Private tertiary hospital
5. Private secondary hospital
6. Clinic
7. Center for Disease Control and Prevention (CDC)
8. Pharmacy
9. Others (please specify: ____________________)

Question 6: Have you considered further studies (e.g., pursuing a master's degree or doctoral degree in medicine)?

1. Yes
2. No(If you choose "Yes", please skip to Question 8; if you choose "No", please proceed to Question 7)

Question 7: What are the main reasons for not considering further studies?

1. Economic pressure
2. Academic pressure
3. Career planning
4. Personal interests and values
5. Others (please specify: ____________________)

Question 8: What is your view on the employment prospects of the Clinical Medicine major?

1. Very optimistic
2. Relatively optimistic
3. Neutral
4. Not very optimistic
5. Very pessimistic

Question 9: In your opinion, what are the most important qualities for a doctor?

1. Professional knowledge and skills
2. Medical ethics and professionalism
3. Continuous learning and improvement
4. Communication skills
5. Teamwork ability
6. Humanistic care

Question 10: Do you have any other suggestions or comments on the Early Clinical exposure  course?

1. No
2. Yes (please specify: ____________________)

Thank you for participating in this survey! Your answers will provide important references for our research and the development of teaching work.
