# Supplementary material for: The Effectiveness of the "Early Clinical Exposure" Course Based on Narrative Medicine in Cultivating the Professional Qualities of Undergraduates in Clinical Medicine: A Mixed-Methods Study
Source: Research Square preprint supplement (doi:10.21203/rs.3.rs-7729445/v1), 2025-12-01
Supplement: Supplementary file 3 [file f2c72c2fb3eeae525475adeb.docx]

**Post-Course Questionnaire for Early Clinical Exposure**

Dear Students,

Greetings! We are members of the Teaching and Research Group for the Early Clinical Exposure  course at Southern Medical University. We kindly ask you to complete this post-course questionnaire. It is estimated to take 5-8 minutes. Your responses will help us evaluate the course effectiveness and improve our teaching.

All results will be used exclusively for teaching research and treated with strict confidentiality. Thank you for your support!

**I. Basic Information**

Which class are you currently in?

Clinical Medicine College 1, Class 1

Clinical Medicine College 1, Class 2

Clinical Medicine College 1, Class 3

Clinical Medicine College 2, Class 1

Clinical Medicine College 2, Class 2

Clinical Medicine College 2, Class 3

What is your gender?

Female

Male

**II. Course Effectiveness Evaluation**

Question 1: How has your overall enthusiasm for the clinical medicine major changed after taking this course?

1. Significantly increased
2. Slightly increased
3. Basically unchanged
4. Slightly decreased
5. Significantly decreased

Question 2: Which modules in the course have the greatest impact on your career awareness? (Multiple choices allowed)

1. Discipline classification and career planning
2. Healthcare system and hospital operation
3. Narrative medicine theory and practice
4. Hospital visit practice
5. Holiday practical activities
6. Others (Please specify: ______)

Question 3: Has the course helped you establish initial clinical thinking?

1. Extremely helpful
2. Quite helpful
3. Average
4. Limited help
5. No help

Question 4: How would you rate your understanding and application ability of the narrative medicine concept?

1. Can proficiently apply narrative medicine methods
2. Understand and can partially apply
3. Understand the basic concept but have difficulty in application
4. Only know the concept
5. Still do not understand

Question 5: Has the course enhanced your awareness and abilities in the following aspects? (Multiple choices allowed)

1. Doctor-patient communication skills
2. Teamwork skills
3. Humanistic care awareness
4. Clinical thinking ability
5. Professional responsibility
6. No significant changes

Question 6: How helpful are the practical sessions (hospital visits, holiday practices) to you?

1. Extremely helpful
2. Quite helpful
3. Average
4. Limited help
5. No help

Question 7: Do you think the course assessment method (80% process-oriented assessment + 20% summative assessment) is reasonable?

1. Extremely reasonable
2. Quite reasonable
3. Average
4. Not very reasonable
5. Extremely unreasonable

III. Changes in Career Planning

Question 8: Has your career planning changed after taking the course?

1. Changed significantly (Please explain: ______)
2. Changed tendentiously
3. Remained the original plan
4. Become more uncertain

Question 9: Which type of work do you now prefer to engage in after graduation? (Multiple choices allowed)

1. Frontline clinical doctor
2. Medical research
3. Medical education
4. Medical management
5. Public health services
6. Work related to pharmaceutical companies
7. Work unrelated to medicine
8. Others (Please specify: ______)

Question 10: What is your current willingness to pursue further studies (master's/doctoral degree)?

1. Willingness significantly increased
2. Willingness slightly increased
3. No change
4. Willingness slightly decreased
5. Willingness significantly decreased

**IV. Special Assessment of Narrative Medicine**

Question 11: How helpful is the narrative medicine module in helping you understand doctor-patient relationships?

1. Extremely helpful
2. Quite helpful
3. Average
4. Limited help
5. No help

Question 12: Will you take the initiative to apply narrative medicine methods in your future studies?

1. Definitely will
2. May will
3. Uncertain
4. May not
5. Definitely will not

Question 13: Which aspect do you think should be strengthened the most in narrative medicine education?

1. Theoretical depth
2. Case analysis
3. Practical application
4. Teaching staff
5. Others (Please specify: ______)

**V. Open-Ended Questions**

Question 14: Please share the most touching narrative medicine case or clinical practice experience in the course.

Question 15: What other suggestions do you have for improving the Early Clinical Exposure  course?

Thank you for your participation! Your opinions will help us continuously improve our teaching!
